# Supplementary material
Source: Springer Nature journal article supplement (https://www.springermedizin.de/resource/supplementary/12879_2013_3585_MOESM3_ESM.pdf/9446186)

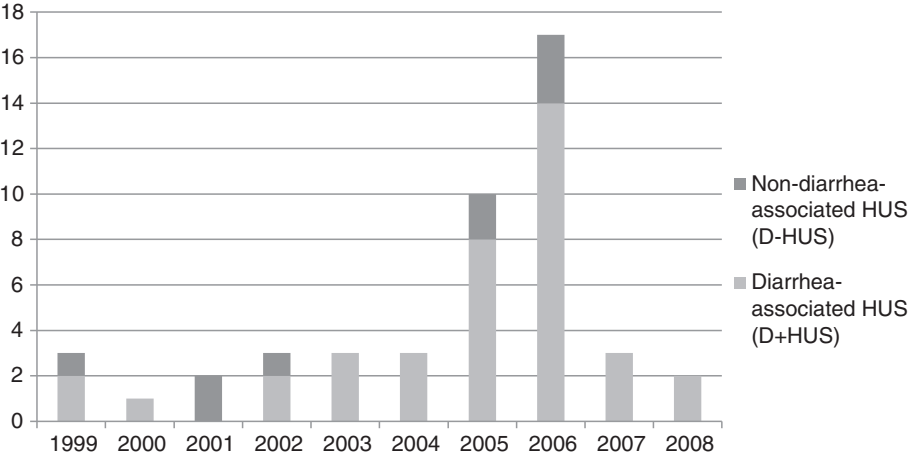

Supplement: MOESM3 [file 9446186]
